# Supplementary material
Source: PubMed Central journal article supplement (PMC8407101)
Supplement: NIHMS1732117-supplement-Supp1.pdf [file NIHMS1732117-supplement-Supp1.pdf]

**Supplementary Table S1: Detailed Staging by Number of Preoperative Cycles**

| <b>Stage</b> | <b>3 NACT cycles</b> | <b>4 NACT cycles</b> | <b>&gt;=5 NACT cycles</b> |
|--------------|----------------------|----------------------|---------------------------|
| <b>IIIA</b>  | 0 (0%)               | 1 (2%)               | 0 (0%)                    |
| <b>IIIB</b>  | 0 (0%)               | 3 (6%)               | 1 (3%)                    |
| <b>IIIC</b>  | 29 (53%)             | 19 (37%)             | 13 (35%)                  |
| <b>IVA</b>   | 5 (9%)               | 5 (10%)              | 4 (11%)                   |
| <b>IVB</b>   | 21 (38%)             | 23 (45%)             | 19 (51%)                  |

\*Fishers-Exact p-value = 0.403

\*\*Fisher's-Exact p-value = 0.574 (when only comparing Stage IIIC, IVA, and IVB)
