# Supplementary material
Source: PubMed Central journal article supplement (PMC8407101)
Supplement: NIHMS1732117-supplement-Supp4.pdf [file NIHMS1732117-supplement-Supp4.pdf]

**Supplementary Table S4: PFS and OS by Reason for Receiving  $\geq 5$  NACT Cycles**

| <b>Progression-Free Survival</b>                 |            |                   |                                           |                            |                       |                |
|--------------------------------------------------|------------|-------------------|-------------------------------------------|----------------------------|-----------------------|----------------|
| <b>Variables</b>                                 | <b>Pt#</b> | <b>POD/Death#</b> | <b>Median PFS<br/>(months;<br/>95%CI)</b> | <b>1Yr PFS<br/>(95%CI)</b> | <b>HR<br/>(95%CI)</b> | <b>Pvalue*</b> |
| <b>Reason for <math>\geq 5</math> cycle NACT</b> |            |                   |                                           |                            |                       |                |
| <b>Surgical</b>                                  | 35         | 29                | 8.7<br>(6.7-12)                           | 32.3%<br>(17.3-48.2%)      | 1                     | 0.808          |
| <b>Other**</b>                                   | 21         | 17                | 7.8<br>(4.4-12.3)                         | 30.6%<br>(12.6-50.8%)      | 1.08<br>(0.59-1.96)   |                |
| <b>Overall Survival</b>                          |            |                   |                                           |                            |                       |                |
| <b>Variables</b>                                 | <b>Pt#</b> | <b>Death#</b>     | <b>Median OS<br/>(months;<br/>95%CI)</b>  | <b>1Yr OS<br/>(95%CI)</b>  | <b>HR<br/>(95%CI)</b> | <b>Pvalue*</b> |
| <b>Reason for <math>\geq 5</math> cycle NACT</b> |            |                   |                                           |                            |                       |                |
| <b>Surgical</b>                                  | 35         | 12                | 33<br>(19.7-Not<br>Estimable)             | 88.4%<br>(71.9-95.5%)      | 1                     | 0.257          |
| <b>Other**</b>                                   | 21         | 9                 | 20.9<br>(10.4-Not<br>Estimable)           | 75.1%<br>(50-88.8%)        | 1.65<br>(0.69-3.93)   |                |

\*P-value obtained via log-rank test

\*\*Other Reasons Include medical factors (n=8), VTE (n=7), patient preference (n=4), and logistics (n=2)
