# Supplementary material
Source: PubMed Central journal article supplement (PMC8407101)
Supplement: NIHMS1732117-supplement-Supp5.pdf [file NIHMS1732117-supplement-Supp5.pdf]

**Supplementary Table S5: Review of Studies Examining Role of NACT Cycles on Survival**

| Reference             | Study Design                                                                  | Findings                                                                                                                                                                             |
|-----------------------|-------------------------------------------------------------------------------|--------------------------------------------------------------------------------------------------------------------------------------------------------------------------------------|
| Altman et al. 2017    | Compared $\geq 4$ to $\leq 3$ NACT cycles                                     | Receiving $\geq 4$ NACT cycles associated with worse OS compared with 0-3 cycles (HR 1.49 95% CI 1.1-2.02, $p=0.011$ ) in multivariate models.                                       |
| Bogani et al. 2017    | Compared $\geq 4$ to $\leq 3$ NACT cycles                                     | Receiving $\geq 4$ NACT cycles associated with worse OS compared to 3 cycles on univariate analysis (HR 1.64 95% CI 1.05-2.4, $p=0.02$ ) but not significant in multivariate models. |
| Xu et al. 2017        | Compared $\geq 5$ to $\leq 4$ NACT cycles in patients who achieved CGR        | Receiving $\geq 5$ NACT cycles associated with worse OS compared to $\leq 4$ NACT cycles (HR 1.42 95% CI 1.11-2.29) in multivariate models.                                          |
| Colombo et al. 2014   | Compared $\geq 5$ to $\leq 4$ NACT cycles                                     | Receiving $\geq 5$ NACT cycles associated with worse OS compared to $\leq 4$ NACT cycles (HR 2.28 95% CI 1.41-3.70, $p=0.001$ ) in multivariate models.                              |
| Bristow and Chi, 2006 | Looked at association of increasing NACT cycles with survival                 | Each incremental increase in NACT cycles was associated with decrease in median survival time of 4.1 months ( $p=0.046$ ).                                                           |
| Phillips et al.       | Examined association of NACT cycles with OS, stratifying by surgical outcome. | In those who achieved a CGR, OS did not vary by NACT cycles. In those who did not achieve a CGR, OS decreased in those receiving $\geq 5$ compared with 3 or 4 NACT cycles.          |
